# Supplementary material for: Attitudes towards Olive Oil Usage, Domestic Storage, and Knowledge of Quality: A Consumers’ Survey in Greece
Source: Nutrients. 2021 Oct 21;13(11):3709. doi: 10.3390/nu13113709 (PMC8621747; doi:10.3390/nu13113709)
Supplement: Supplementary file 1 [file nutrients-13-03709-s001.zip › nutrients-1421938-supplementary.pdf]

## Questionnaire on olive oil consumers' knowledge, attitude and behaviour regarding choice, safety and fraudulent practices of table olives and olive oil in Greece

**Date of interview:** ..... / ..... / 2020

**Gender:** ☐ Male ☐ Female

**Age group (years):** ☐ 18-30 ☐ 31- 50 ☐ 51-65 ☐ >65

**Place of Residence:** ☐ Attica ☐ Sterea Ellada ☐ Thessaly ☐ Crete  
☐ Central Macedonia ☐ East Macedonia  
☐ West Macedonia ☐ Epirus ☐ Thrace  
☐ Peloponnese ☐ Aegean islands ☐ Ionian islands

**Number of household members (total):** \_\_\_\_\_ **How many are below 18 years?** \_\_\_\_\_

**Nationality:** ☐ Greek ☐ Other .....

**Are you actively involved in food purchasing and/or food preparation in your household?**

☐ Yes ☐ No **[If No, your participation in this survey ends here]**

**In your house, do you use olive oil?** ☐ Yes ☐ No **[If No, the survey ends here]**

**Level of education:** ☐ Primary ☐ Secondary ☐ Tertiary

**If university graduate: Is your degree related to food?** ☐ Yes ☐ No

**In your household (you can tick more than one answer)**

☐ I live alone ☐ I live with my parents. No of parent/s \_\_\_\_\_  
☐ I live with my partner ☐ I live with children. No of children \_\_\_\_\_

| <b>1. Usually in your household which fat/oil do you use for;</b> | <b>Olive oil</b>      | <b>Other vegetable oil<br/>(e.g. corn oil, sunflower oil)</b> | <b>Margarine</b>      | <b>Butter</b>         | <b>I do not know</b>  |
|-------------------------------------------------------------------|-----------------------|---------------------------------------------------------------|-----------------------|-----------------------|-----------------------|
| 1.1 salads (i.e. salad dressing)                                  | <input type="radio"/> | <input type="radio"/>                                         | <input type="radio"/> | <input type="radio"/> | <input type="radio"/> |
| 1.2 preparing savoury dishes<br>(casserole dishes, baked dishes)  | <input type="radio"/> | <input type="radio"/>                                         | <input type="radio"/> | <input type="radio"/> | <input type="radio"/> |
| 1.3 frying                                                        | <input type="radio"/> | <input type="radio"/>                                         | <input type="radio"/> | <input type="radio"/> | <input type="radio"/> |
| 1.4 preparing pies                                                | <input type="radio"/> | <input type="radio"/>                                         | <input type="radio"/> | <input type="radio"/> | <input type="radio"/> |
| 1.5 preparing desserts<br>(e.g. cakes, biscuits, baklava etc.)    | <input type="radio"/> | <input type="radio"/>                                         | <input type="radio"/> | <input type="radio"/> | <input type="radio"/> |

**1b. Occasionally, do you use olive oil in any of the following (if not indicated in question 1)?**

☐ salads  
☐ preparing savoury dishes (casserole dishes, baked dishes)  
☐ frying  
☐ preparing pies  
☐ preparing desserts (e.g. cakes, biscuits, baklava etc.)  
☐ other \_\_\_\_\_

**2. What type of olive oil do you use? (you can tick more than one answer)**

- ☐ N/A - I do not use olive oil
- ☐ Extra virgin olive oil
- ☐ Virgin olive oil
- ☐ Refined oil / Olive oil composed of refined olive oils and virgin olive oils
- ☐ Olive pomace oil
- ☐ I do not know

**3. Do you or your family/relatives produce olive oil?**

- ☐ Yes
- ☐ No

**4. Regarding the olive oil that you use: (you can tick more than one answer)**

- ☐ I purchase it from retail shop (i.e. brand label from supermarket/minimarket/delicatessen shop)
- ☐ I purchase it "loose" in metal/tin containers from individuals that I do not know/ do not know well (i.e. not brand label)
- ☐ I use olive oil that is produced by me and/or my relatives and/or people that I know very well
- ☐ N/A - I do not use olive oil

**4.1. What do you check before purchasing branded olive oil? (Participants answer this question only if they indicate in question 4 that they purchase branded olive oil)**

- ☐ Packaging (container) material (e.g. glass, metal, plastic etc.)
- ☐ Acidity
- ☐ Geographical location
- ☐ Product of Protected Origin
- ☐ Health claims
- ☐ Price
- ☐ None of the above

**5. An olive oil is of superior quality when: (you can tick more than one answer):**

- ☐ It has high acidity
- ☐ It has low acidity
- ☐ It has bitter taste with spicy notes
- ☐ It is derived by cold mechanical extraction
- ☐ It is clear (i.e. not cloudy)
- ☐ It has short shelf life
- ☐ It is organic
- ☐ I do not know

**6. The taste of olive oil can have bitter or spicy notes because: (you can tick more than one answer):**

- ☐ It is beyond the "Best Before" date
- ☐ It has not been extracted properly
- ☐ It has high acidity
- ☐ It is rich in phenolic compounds with antioxidant effects
- ☐ I do not know

**7. The statement that “An olive oil is extra virgin when its acidity less than 0.8%” is:**

- ☐ Correct
- ☐ False
- ☐ I do not know

**8. Between the following two types of olive oil, which one is superior with regard to its quality characteristics?**

- ☐ Refined olive oil
- ☐ Extra virgin olive oil
- ☐ I do not know

**9. Are you able to tell the difference in taste and aroma between “refined olive oil” and “extra virgin olive oil”?**

- ☐ Yes
- ☐ No
- ☐ I do not know/ I do not answer

**10. Olive oil is suitable for use as: (you can tick more than one answer)**

- ☐ Raw in salads and dishes
- ☐ Cooking at low temperatures
- ☐ Frying at temperatures up to 190°C
- ☐ I do not know

**11. When is olive oil best consumed?**

- ☐ Immediately after its extraction
- ☐ Six months after its extraction
- ☐ I do not know

**12. In comparison to other types of vegetable oil (e.g. sunflower oil, corn oil, rapeseed oil), do you believe that olive oil is:**

- ☐ It is equally healthy/ nutritious
- ☐ Its is less healthy/ nutritious
- ☐ Its is more healthy/ nutritious
- ☐ I do not know

**13. What type of containers do you have/use to keep the olive oil at home? (you can tick more than one answer)**

- ☐ N/A - I do not have olive oil
- ☐ Glass transparent containers which are not coloured
- ☐ Glass transparent containers which are coloured green or brown
- ☐ Plastic containers (as sold in retail shops)
- ☐ Plastic containers (initially containing water, soft drinks or other liquids and then reused to transfer olive oil from larger containers to smaller ones)
- ☐ Metal/tin containers
- ☐ Other (please specify).....

**14. Where do you usually keep/store the olive oil in your house?**

- ☐ On the kitchen bench next to the oven or hotplate/stove
- ☐ In a cupboard (without sunlight and cool)
- ☐ Other
- ☐ I do not know/I do not remember

**15. Are you concerned whether the olive oil that you use is adulterated?**

- ☐ I am concerned
- ☐ I am not concerned
- ☐ I have never thought about it

**15.1 If you are concerned, what measures have you taken or are you planning to take?**

- ☐ I purchase/use only specific branded bottled olive oil
- ☐ I use only the olive oil that I and/or relatives/friends produce
- ☐ I do not take any measures

**15.2 If you are not concerned, please justify why you are not concerned (unprompted response)**

---

---

---

**16. What does “olive oil adulteration” mean to you? (unprompted response)**

---

---

- ☐ Mixing olive oils of different types/qualities from different parts of Greece or abroad and indicating on the label that it is extra virgin olive oil
- ☐ Mixing olive oil from Greece with olive oil of same type/quality from other countries and indicating on the label that the country of origin is only Greece
- ☐ Mixing olive oil with other vegetable oils (e.g. sunflower oil)
- ☐ Adding colour to vegetable oil and selling it as olive oil
- ☐ Having misleading label on the package (regarding its quality and place of origin)
- ☐ Other (please specify): \_\_\_\_\_
- ☐ I do not know

**16b. Which of the following you would regard it as olive oil adulteration? (Prompted – indicate an answer that has not been indicated in the unprompted response)**

- ☐ Mixing olive oils of different types/qualities from different parts of Greece or abroad and indicating on the label that it is extra virgin olive oil
- ☐ Mixing olive oil from Greece with olive oil of same type/quality from other countries and indicating on the label that the country of origin is only Greece
- ☐ Mixing olive oil with other vegetable oils (e.g. sunflower oil)
- ☐ Adding colour to vegetable oil and selling it as olive oil
- ☐ Having misleading label on the package (regarding its quality and place of origin)

**17. How would you suspect olive oil fraud? My suspicion is based on: (you can tick more than one answer)**

- ☐ Price
- ☐ Taste
- ☐ Colour
- ☐ Other. Please specify: \_\_\_\_\_
- ☐ I do not know / I do not answer

**18. Do you have a specific branded olive oil that you prefer to purchase (and you are loyal to)?**

- ☐ Yes
- ☐ No
- ☐ I use only loose (non-branded) olive oil
- ☐ I do not use olive oil

**19. Do you consume table olives?**

- ☐ Yes
- ☐ No

**If No, please go to question 20**

**19.1 If Yes, are they? (you can tick more than one answer)**

- ☐ Bought prepackaged and branded
- ☐ Bought "loose"
- ☐ Prepared by myself/relatives/close friends

**19.2. If you buy prepackaged branded table olives, do you choose a specific brand?**

- ☐ Yes
- ☐ No

**19.3 If you buy "loose" table olives, where do you buy them from?**

- ☐ Supermarket
- ☐ Mini market / grocery store
- ☐ Fruit and vegetable street market (open air market)

**19.4 If you buy "loose" table olives but not prepackaged branded ones, what is the reason behind this?**

- ☐ Prepackaged branded olives have higher cost
- ☐ You cannot try the prepackaged olives before purchasing them
- ☐ Olives sold "loose" are fresher than those prepackaged
- ☐ Olives sold "loose" are of better quality compared to those prepackaged
- ☐ Other (please specify): \_\_\_\_\_
- ☐ I do not buy "loose" olives

**20. Do you believe that table olives can be adulterated?**

- ☐ Yes
- ☐ No
- ☐ I do not know / I have not thought about it

**20.1 If Yes, how could table olives be adulterated? (not prompted answer)**

---

---

**(PROMPTED answer – you can tick more than one answer)**

- ☐ Removing the bitterness of the olives with chemical treatment
- ☐ Mixing table olives of protected designation of origin with other varieties
- ☐ Mixing table olives from Greece with table olives from abroad
- ☐ Other (please specify): \_\_\_\_\_
- ☐ I do not know how adulteration can be done

**20.2 Which of the following do you consider to be adulteration in table olives?**

- ☐ Removing the bitterness of the olives with chemical treatment
- ☐ Mixing table olives of protected designation of origin with other varieties
- ☐ Mixing table olives from Greece with table olives from abroad
- ☐ Other (please specify): \_\_\_\_\_
- ☐ None of the above

**21. How much trust do you have as consumer to the following with regard to potential olive oil adulteration? (Use of a 5-point Likert scale)**

|                        | I have no trust at all | I have no trust | I have some trust | I have trust | I have absolute trust |
|------------------------|------------------------|-----------------|-------------------|--------------|-----------------------|
| Olive mills            | 1                      | 2               | 3                 | 4            | 5                     |
| Olive oil distributors | 1                      | 2               | 3                 | 4            | 5                     |
| Olive oil companies    | 1                      | 2               | 3                 | 4            | 5                     |

**22. How much trust do you have in public food safety authorities with respect to olive oil and table olives?**

- ☐ I have no trust at all
- ☐ I have no trust
- ☐ I have some trust
- ☐ I have trust
- ☐ I have absolute trust

**23. Do you think that the price of olive oil compared to other fats and oils (i.e. other vegetable oils, margarines) is:**

- ☐ Very high
- ☐ High
- ☐ Normal
- ☐ Low
- ☐ Very low
- ☐ I do not know

**Δ.1 What is your job?** \_\_\_\_\_

**Δ2. How much money do you spend per month for food purchasing (e.g. supermarkets, grocery stores)?**

- ☐ up to 50 Euros
- ☐ 51 - 100 Euros
- ☐ 101 - 150 Euros
- ☐ 151 - 200 Euros
- ☐ 201 - 250 Euros
- ☐ 251 - 300 Euros
- ☐ 301 - 350 Euros
- ☐ 351 - 400 Euros
- ☐ 401 - 450 Euros
- ☐ 451 - 500 Euros
- ☐ ≥ 501 Euros

**Δ3. What is the monthly income of your household?**

- ☐ up to 380 Euros
- ☐ 381 - 500 Euros
- ☐ 501 - 620 Euros
- ☐ 621 - 740 Euros
- ☐ 741 - 880 Euros
- ☐ 881 - 1.180 Euros
- ☐ 1.181 - 1.470 Euros
- ☐ 1.471 - 1.760 Euros
- ☐ 1.761 - 2.060 Euros
- ☐ 2.061 - 2.350 Euros
- ☐ ≥ 2.351 Euros
